# Supplementary material for: Novel Virulent Bacteriophages Infecting Mediterranean Isolates of the Plant Pest Xylella fastidiosa and Xanthomonas albilineans
Source: MDPI journal article supplement (doi:10.3390/v13050725), 2021-04-21
Supplement: s1 [file s1]

**Table S1.** Genomic information used for whole genome phylogeny in Figure 4.

| Phage name                                  | Host                                      | Family                  | Size (nt) | GenBank                     | Order        | Family            | Genus                         | Subfamily                     | Specie                              |
|---------------------------------------------|-------------------------------------------|-------------------------|-----------|-----------------------------|--------------|-------------------|-------------------------------|-------------------------------|-------------------------------------|
| <i>Stenotrophomonas</i> phage DLP4          | <i>S. maltophilia</i> D1585               | Siphoviridae            | 63945     | <a href="#">MG018224.1</a>  | Caudovirales | Siphoviridae      | Pamexvirus                    | unclassified Pamexvirus       |                                     |
| <i>Stenotrophomonas</i> phage IME13         | <i>S. maltophilia</i>                     | Myoviridae              | 162327    | <a href="#">JX306041.1</a>  | Caudovirales | Myoviridae        | Tulanevirus                   |                               | <i>Stenotrophomonas</i> virus IME13 |
| <i>Stenotrophomonas</i> phage IME15         | <i>S. maltophilia</i>                     | Podoviridae             | 38513     | <a href="#">JX872508.1</a>  | Caudovirales | Autographiviridae | Studiervirinae                | Teseptimavirus                | <i>Stenotrophomonas</i> virus IME15 |
| <i>Stenotrophomonas</i> phage IME-SM1       | <i>S. maltophilia</i>                     | unclassified            | 159514    | <a href="#">KR560069.1</a>  | Caudovirales | Ackermannviridae  | unclassified Ackermannviridae |                               |                                     |
| <i>Stenotrophomonas</i> phage S1            | <i>S. maltophilia</i>                     | Siphoviridae            | 40287     | <a href="#">EU849489.1</a>  | Caudovirales | Siphoviridae      | unclassified Siphoviridae     |                               |                                     |
| <i>Stenotrophomonas</i> phage Smp131        | <i>S. maltophilia</i>                     | Myoviridae              | 33525     | <a href="#">JQ809663.1</a>  | Caudovirales | Myoviridae        | Peduovirinae                  | Simpcentumvirus               |                                     |
| <i>Stenotrophomonas</i> phage vB_SmaS-DLP_1 | <i>S. maltophilia</i> D1585               | Siphoviridae            | 42887     | <a href="#">KR537872.1</a>  | Caudovirales | Siphoviridae      | Sep-timatrevirus              | unclassified Sep-timatrevirus |                                     |
| <i>Stenotrophomonas</i> phage vB_SmaS-DLP_2 | <i>S. maltophilia</i> D1585               | Siphoviridae            | 42593     | <a href="#">KR537871.1</a>  | Caudovirales | Siphoviridae      | Sep-timatrevirus              | unclassified Sep-timatrevirus |                                     |
| <i>Stenotrophomonas</i> phage vB_SmaS-DLP_6 | <i>S. maltophilia</i> D1571               | Myoviridae <sup>1</sup> | 168489    | <a href="#">KU682439.2</a>  | Caudovirales | Ackermannviridae  | unclassified Ackermannviridae |                               |                                     |
| <i>Xanthomonas</i> phage Carpasina          | <i>X. campestris</i>                      | Myoviridae              | 61939     | <a href="#">MH059633.1</a>  | Caudovirales | Myoviridae        | Carpasina-virus               |                               | <i>Xanthomonas</i> virus Carpasina  |
| <i>Xanthomonas</i> phage CP1                | <i>X. axonopodis</i> pv. citri            | Siphoviridae            | 43870     | <a href="#">AB720063.2</a>  | Caudovirales | Siphoviridae      | Klementvirus                  |                               |                                     |
| <i>Xanthomonas</i> phage CP2                | <i>X. axonopodis</i> pv. citri            | Podoviridae             | 42963     | <a href="#">AB720064.1</a>  | Caudovirales | Podoviridae       | unclassified Podoviridae      |                               |                                     |
| <i>Xanthomonas</i> phage f20-Xaj            | <i>X. arboricola</i> pv. juglandis X-J303 | Podoviridae             | 43851     | <a href="#">NC_030928.1</a> | Caudovirales | Autographiviridae | Pradovirus                    |                               | <i>Xanthomonas</i> virus f20        |
| <i>Xanthomonas</i> phage f29-Xaj            | <i>X. arboricola</i> pv.                  | Siphoviridae            | 41865     | <a href="#">KU595434.1</a>  | Caudovirales | Siphoviridae      | Jerseyvirus                   | unclassified Jerseyvirus      |                                     |

|                                                  |                                                                                       |                                             |            |                                                 |                   |                        |                              |                                      |                                 |
|--------------------------------------------------|---------------------------------------------------------------------------------------|---------------------------------------------|------------|-------------------------------------------------|-------------------|------------------------|------------------------------|--------------------------------------|---------------------------------|
|                                                  | <i>juglandis</i><br>X-J303                                                            |                                             |            |                                                 |                   |                        |                              |                                      |                                 |
|                                                  | <i>X. arbori-</i>                                                                     |                                             |            |                                                 |                   |                        |                              |                                      |                                 |
| <i>Xanthomonas</i><br>phage f30-Xaj              | <i>cola</i> pv.<br><i>juglandis</i><br>X-J303                                         | <i>Podoviri-</i><br><i>dae</i>              | 44262      | <a href="#">NC 03093</a><br><a href="#">7.1</a> | Caudovi-<br>rales | Autographi-<br>viridae | Pradovirus                   |                                      |                                 |
| <i>Xanthomonas</i><br>phage KPhi1                | <i>X. euvesi-</i><br><i>catoria</i>                                                   | <i>Myoviri-</i><br><i>dae</i>               | 46077      | <a href="#">KY210139</a><br><a href="#">1</a>   | Caudovi-<br>rales | Myoviridae             | unclassified<br>Myoviridae   |                                      |                                 |
| <i>Xanthomonas</i><br>phage OP1                  | <i>X. oryzae</i><br>pv. <i>oryzae</i>                                                 | <i>Si-</i><br><i>phoviri-</i><br><i>dae</i> | 43785      | <a href="#">AP008979</a><br><a href="#">1</a>   | Caudovi-<br>rales | Siphoviridae           | Xipdeca-<br>virus            |                                      |                                 |
| <i>Xanthomonas</i><br>phage OP2                  | <i>X. oryzae</i><br>pv. <i>oryzae</i>                                                 | <i>Myoviri-</i><br><i>dae</i>               | 46643      | <a href="#">AP008986</a><br><a href="#">1</a>   | Caudovi-<br>rales | Myoviridae             | Naesvirus                    |                                      | <i>Xanthomonas</i><br>virus OP2 |
| <i>Xanthomonas</i><br>phage phi<br>Xc10          | <i>X. cam-</i><br><i>pestris</i> pv.<br><i>citri</i>                                  | <i>Podoviri-</i><br><i>dae</i>              | 44597      | <a href="#">MF375456</a><br><a href="#">1</a>   | Caudovi-<br>rales | Autographi-<br>viridae | Pradovirus                   |                                      |                                 |
| <i>Xanthomonas</i><br>phage phiL7                | <i>X. cam-</i><br><i>pestris</i> pv.<br><i>campestris</i>                             | <i>Si-</i><br><i>phoviri-</i><br><i>dae</i> | 44080      | <a href="#">EU717894</a><br><a href="#">1</a>   | Caudovi-<br>rales | Siphoviridae           | Eisen-<br>starkvirus         |                                      |                                 |
| <i>Xanthomonas</i><br>phage<br>vB_XveM_DI<br>BBI | <i>X. vesica-</i><br><i>toria</i>                                                     | <i>Myoviri-</i><br><i>dae</i>               | 49981      | <a href="#">JN022534</a><br><a href="#">1</a>   | Caudovi-<br>rales | Myoviridae             | unclassified<br>Myoviridae   |                                      |                                 |
| <i>Xanthomonas</i><br>phage XacN1                | <i>X. citri</i>                                                                       | <i>Myoviri-</i><br><i>dae</i>               | 38467<br>0 | <a href="#">AP018399</a><br><a href="#">1</a>   | Caudovi-<br>rales | Myoviridae             | unclassified<br>Myoviridae   |                                      |                                 |
| <i>Xanthomonas</i><br>phage XAJ2                 | <i>X. ar-</i><br><i>boricola</i><br>pv. <i>ju-</i><br><i>glandis</i><br><i>X. ar-</i> | <i>Si-</i><br><i>phoviri-</i><br><i>dae</i> | 49241      | <a href="#">KU197014</a><br><a href="#">1</a>   | Caudovi-<br>rales | Siphoviridae           | unclassified<br>Siphoviridae |                                      |                                 |
| <i>Xanthomonas</i><br>phage XAJ24                | <i>boricola</i><br>pv. <i>ju-</i><br><i>glandis</i>                                   | <i>Podoviri-</i><br><i>dae</i>              | 44861      | <a href="#">KU197013</a><br><a href="#">1</a>   | Caudovi-<br>rales | Autographi-<br>viridae | Pradovirus                   |                                      |                                 |
| <i>Xanthomonas</i><br>phage Xoo-<br>sp2          | <i>X. oryzae</i><br>pv. <i>oryzae</i>                                                 | <i>Si-</i><br><i>phoviri-</i><br><i>dae</i> | 60497      | <a href="#">KX241618</a><br><a href="#">1</a>   | Caudovi-<br>rales | Siphoviridae           | Pamexvirus                   | unclassi-<br>fied<br>Pamexviri-<br>s |                                 |
| <i>Xanthomonas</i><br>phage Xop411               | <i>X. oryzae</i>                                                                      | <i>Si-</i><br><i>phoviri-</i><br><i>dae</i> | 44520      | <a href="#">DQ777876</a><br><a href="#">1</a>   | Caudovi-<br>rales | Siphoviridae           | Xipdeca-<br>virus            |                                      |                                 |
| <i>Xanthomonas</i><br>phage Xp10                 | <i>X. oryzae</i>                                                                      | <i>Si-</i><br><i>phoviri-</i><br><i>dae</i> | 44373      | <a href="#">AY299121</a><br><a href="#">1</a>   | Caudovi-<br>rales | Siphoviridae           | Xipdeca-<br>virus            |                                      |                                 |
| <i>Xanthomonas</i><br>phage Xp15                 | <i>X. cam-</i><br><i>pestris</i> pv.<br><i>pelargonii</i>                             | <i>Si-</i><br><i>phoviri-</i><br><i>dae</i> | 55770      | <a href="#">AY986977</a><br><a href="#">1</a>   | Caudovi-<br>rales | Siphoviridae           | unclassified<br>Siphoviridae |                                      |                                 |
| <i>Xanthomonas</i><br>phage XPP1                 | <i>X. oryzae</i><br>pv. <i>oryzae</i>                                                 | <i>Myoviri-</i><br><i>dae</i>               | 46195      | <a href="#">MG944227</a><br><a href="#">1</a>   | Caudovi-<br>rales | Myoviridae             | Vidavervirus                 | unclassi-<br>fied Vida-<br>vervirus  |                                 |

**Table S2.** Comparison matrix for similarities between genomes of the phages sequenced in this study. All sequences were assessed by comparing the percentage of shared 22-mers.

[illegible]

|             |   |            |              |            |   |            |              |            |   |            |              |              |              |            |              |              |            |            |             |              |              |      |      |      |   |      |   |      |   |
|-------------|---|------------|--------------|------------|---|------------|--------------|------------|---|------------|--------------|--------------|--------------|------------|--------------|--------------|------------|------------|-------------|--------------|--------------|------|------|------|---|------|---|------|---|
| 61.<br>C15  | F | 62.<br>99  | 0.63.<br>99  | 0.<br>64.  | 0 | 65.<br>1   | 0.66.<br>99  | 0.<br>67.  | 0 | 68.<br>99  | 0.69.<br>25  | 0.70.<br>25  | 0.71.<br>25  | 0.<br>72.  | 0            | 73.          | 0          | 74.<br>99  | 0.75.<br>99 | 0.           |              |      |      |      |   |      |   |      |   |
| 76.<br>C17  | F | 77.<br>99  | 0.78.<br>99  | 0.<br>79.  | 0 | 80.        | 1            | 81.        | 1 | 82.        | 0            | 83.          | 1            | 84.<br>25  | 0.85.<br>25  | 0.86.<br>25  | 0.<br>87.  | 0          | 88.         | 0            | 89.          | 1    | 90.  | 1    |   |      |   |      |   |
| 91.<br>C23  | F | 92.        | 0            | 93.        | 0 | 94.        | 0            | 95.        | 0 | 96.        | 0            | 97.          | 1            | 98.        | 0            | 99.          | 0          | 100.       | 0           | 101.         | 0            | 102. | 0    | 103. | 0 | 104. | 0 | 105. | 0 |
| 106.<br>C25 | F | 107.<br>99 | 0.108.<br>99 | 0.<br>109. | 0 | 110.       | 1            | 111.       | 1 | 112.       | 0            | 113.         | 1            | 114.<br>25 | 0.115.<br>25 | 0.116.<br>25 | 0.<br>117. | 0          | 118.        | 0            | 119.         | 1    | 120. | 1    |   |      |   |      |   |
| 121.<br>C28 | F | 122.<br>25 | 0.123.<br>25 | 0.<br>124. | 0 | 125.<br>25 | 0.126.<br>25 | 0.<br>127. | 0 | 128.<br>25 | 0.           | 129.         | 1            | 130.<br>95 | 0.131.<br>75 | 0.<br>132.   | 0          | 133.       | 0           | 134.<br>25   | 0.135.<br>25 | 0.   |      |      |   |      |   |      |   |
| 136.<br>C30 | F | 137.<br>25 | 0.138.<br>25 | 0.<br>139. | 0 | 140.<br>26 | 0.141.<br>26 | 0.<br>142. | 0 | 143.<br>26 | 0.144.<br>95 | 0.<br>145.   | 1            | 146.<br>75 | 0.<br>147.   | 0            | 148.       | 0          | 149.<br>26  | 0.150.<br>26 | 0.           |      |      |      |   |      |   |      |   |
| 151.<br>C39 | F | 152.<br>25 | 0.153.<br>25 | 0.<br>154. | 0 | 155.<br>25 | 0.156.<br>25 | 0.<br>157. | 0 | 158.<br>25 | 0.159.<br>75 | 0.160.<br>75 | 0.<br>161.   | 1          | 162.         | 0            | 163.       | 0          | 164.<br>25  | 0.165.<br>25 | 0.           |      |      |      |   |      |   |      |   |
| 166.<br>C41 | F | 167.       | 0            | 168.       | 0 | 169.       | 0            | 170.       | 0 | 171.       | 0            | 172.         | 0            | 173.       | 0            | 174.         | 0          | 175.       | 0           | 176.         | 0            | 177. | 1    | 178. | 0 | 179. | 0 | 180. | 0 |
| 181.<br>C44 | F | 182.       | 0            | 183.       | 0 | 184.       | 0            | 185.       | 0 | 186.       | 0            | 187.         | 0            | 188.       | 0            | 189.         | 0          | 190.       | 0           | 191.         | 0            | 192. | 0    | 193. | 1 | 194. | 0 | 195. | 0 |
| 196.<br>C47 | F | 197.<br>99 | 0.198.<br>99 | 0.<br>199. | 0 | 200.<br>99 | 0.201.<br>99 | 0.<br>202. | 0 | 203.<br>99 | 0.204.<br>25 | 0.205.<br>25 | 0.206.<br>25 | 0.<br>207. | 0            | 208.         | 0          | 209.       | 1           | 210.<br>99   | 0.           |      |      |      |   |      |   |      |   |
| 211.<br>C57 | F | 212.<br>99 | 0.213.<br>99 | 0.<br>214. | 0 | 215.<br>99 | 0.216.<br>99 | 0.<br>217. | 0 | 218.<br>99 | 0.219.<br>25 | 0.220.<br>25 | 0.221.<br>25 | 0.<br>222. | 0            | 223.         | 0          | 224.<br>99 | 0.          | 225.         | 1            |      |      |      |   |      |   |      |   |

**Table S3.** Genomic information used for MCP and Terminase\_lsu phylogeny (Fig. S3).

| Phage name                                  | Host                                             | Family                         | Size (nt) | GenBank                     | Major Capsid Protein ID        | Terminase Large Subunit Protein ID |
|---------------------------------------------|--------------------------------------------------|--------------------------------|-----------|-----------------------------|--------------------------------|------------------------------------|
| <i>Stenotrophomonas</i> phage DLP4          | <i>S. maltophilia</i> D1585                      | <i>Siphoviridae</i>            | 63945     | <a href="#">MG018224.1</a>  | <a href="#">ATS92208.1</a>     | <a href="#">ATS92199.1</a>         |
| <i>Stenotrophomonas</i> phage IME13         | <i>S. maltophilia</i>                            | <i>Myoviridae</i>              | 162327    | <a href="#">JX306041.1</a>  | <a href="#">AFQ22650.1</a>     | <a href="#">AFQ22643.1</a>         |
| <i>Stenotrophomonas</i> phage IME15         | <i>S. maltophilia</i>                            | <i>Podoviridae</i>             | 38513     | <a href="#">JX872508.1</a>  | <a href="#">AFV51470.1</a>     | <a href="#">AFV51483.1</a>         |
| <i>Stenotrophomonas</i> phage IME-SM1       | <i>S. maltophilia</i>                            | <i>unclassified</i>            | 159514    | <a href="#">KR560069.1</a>  | <a href="#">AKO61665.1</a>     | <a href="#">AKO61658.1</a>         |
| <i>Stenotrophomonas</i> phage S1            | <i>S. maltophilia</i>                            | <i>Siphoviridae</i>            | 40287     | <a href="#">EU849489.1</a>  | <a href="#">ACJ24732.1</a>     | <a href="#">ACJ24728.1</a>         |
| <i>Stenotrophomonas</i> phage Smp131        | <i>S. maltophilia</i>                            | <i>Myoviridae</i>              | 33525     | <a href="#">IQ809663.1</a>  | <a href="#">AFJ75479.1</a>     | <a href="#">AFJ75477.1</a>         |
| <i>Stenotrophomonas</i> phage vB_SmaS-DLP_1 | <i>S. maltophilia</i> D1585                      | <i>Siphoviridae</i>            | 42887     | <a href="#">KR537872.1</a>  | <a href="#">AKI28799.1</a>     | <a href="#">AKI28793.1</a>         |
| <i>Stenotrophomonas</i> phage vB_SmaS-DLP_2 | <i>S. maltophilia</i> D1585                      | <i>Siphoviridae</i>            | 42593     | <a href="#">KR537871.1</a>  | <a href="#">AKI28741.1</a>     | <a href="#">AKI28735.1</a>         |
| <i>Stenotrophomonas</i> phage vB_SmaS-DLP_6 | <i>S. maltophilia</i> D1571                      | <i>Myoviridae</i> <sup>1</sup> | 168489    | <a href="#">KU682439.2</a>  | <a href="#">AMQ65921.1</a>     | <a href="#">AMQ65913.1</a>         |
| <i>Xanthomonas</i> phage Car-pasina         | <i>X. campestris</i>                             | <i>Myoviridae</i>              | 61939     | <a href="#">MH059633.1</a>  | <a href="#">AWD92405.1</a>     | <a href="#">AWD92396.1</a>         |
| <i>Xanthomonas</i> phage CP1                | <i>X. axonopodis</i> pv. <i>citri</i>            | <i>Siphoviridae</i>            | 43870     | <a href="#">AB720063.2</a>  | <a href="#">BAM29080.1</a>     | <a href="#">BAM29076.1</a>         |
| <i>Xanthomonas</i> phage CP2                | <i>X. axonopodis</i> pv. <i>citri</i>            | <i>Podoviridae</i>             | 42963     | <a href="#">AB720064.1</a>  | <a href="#">BAM66438.1</a>     | <a href="#">BAM66434.1</a>         |
| <i>Xanthomonas</i> phage f20-Xaj            | <i>X. arboricola</i> pv. <i>juglandis</i> X-J303 | <i>Podoviridae</i>             | 43851     | <a href="#">NC_030928.1</a> | <a href="#">YP_009275467.1</a> | <a href="#">YP_009275454.1</a>     |

|                                        |                                                  |                     |        |                             |                                |                                |
|----------------------------------------|--------------------------------------------------|---------------------|--------|-----------------------------|--------------------------------|--------------------------------|
| <i>Xanthomonas</i> phage f29-Xaj       | <i>X. arboricola</i> pv. <i>juglandis</i> X-J303 | <i>Siphoviridae</i> | 41865  | <a href="#">KU595434.1</a>  | <a href="#">AMM44781.1</a>     | <a href="#">AMM44766.1</a>     |
| <i>Xanthomonas</i> phage f30-Xaj       | <i>X. arboricola</i> pv. <i>juglandis</i> X-J303 | <i>Podoviridae</i>  | 44262  | <a href="#">NC_030937.1</a> | <a href="#">YP_009276308.1</a> | <a href="#">YP_009276349.1</a> |
| <i>Xanthomonas</i> phage KPhi1         | <i>X. euvesicatoria</i>                          | <i>Myoviridae</i>   | 46077  | <a href="#">KY210139.1</a>  | <a href="#">APQ41901.1</a>     | <a href="#">APQ41906.1</a>     |
| <i>Xanthomonas</i> phage OP1           | <i>X. oryzae</i> pv. <i>oryzae</i>               | <i>Siphoviridae</i> | 43785  | <a href="#">AP008979.1</a>  | <a href="#">BAE72712.1</a>     | <a href="#">BAE72709.1</a>     |
| <i>Xanthomonas</i> phage OP2           | <i>X. oryzae</i> pv. <i>oryzae</i>               | <i>Myoviridae</i>   | 46643  | <a href="#">AP008986.1</a>  | <a href="#">BAE72772.1</a>     | <a href="#">BAE72777.1</a>     |
| <i>Xanthomonas</i> phage phi Xc10      | <i>X. campestris</i> pv. <i>citri</i>            | <i>Podoviridae</i>  | 44597  | <a href="#">MF375456.1</a>  | <a href="#">ASZ72035.1</a>     | <a href="#">ASZ72044.1</a>     |
| <i>Xanthomonas</i> phage phiL7         | <i>X. campestris</i> pv. <i>campestris</i>       | <i>Siphoviridae</i> | 44080  | <a href="#">EU717894.1</a>  | <a href="#">ACE75746.1</a>     | <a href="#">ACE75743.1</a>     |
| <i>Xanthomonas</i> phage vB_XveM_DIBBI | <i>X. vesicatoria</i>                            | <i>Myoviridae</i>   | 49981  | <a href="#">JN022534.1</a>  | <a href="#">AEX65675.1</a>     | <a href="#">AEX65672.1</a>     |
| <i>Xanthomonas</i> phage XacN1         | <i>X. citri</i>                                  | <i>Myoviridae</i>   | 384670 | <a href="#">AP018399.1</a>  | <a href="#">BBA65422.1</a>     | <a href="#">BBA65403.1</a>     |
| <i>Xanthomonas</i> phage XAJ2          | <i>X. arboricola</i> pv. <i>juglandis</i>        | <i>Siphoviridae</i> | 49241  | <a href="#">KU197014.1</a>  | <a href="#">AMW36127.1</a>     | <a href="#">AMW36122.1</a>     |
| <i>Xanthomonas</i> phage XAJ24         | <i>X. arboricola</i> pv. <i>juglandis</i>        | <i>Podoviridae</i>  | 44861  | <a href="#">KU197013.1</a>  | <a href="#">AMW36095.1</a>     | <a href="#">AMW36109.1</a>     |
| <i>Xanthomonas</i> phage Xoo-sp2       | <i>X. oryzae</i> pv. <i>oryzae</i>               | <i>Siphoviridae</i> | 60497  | <a href="#">KX241618.1</a>  | <a href="#">ANT45254.1</a>     | <a href="#">ANT45236.1</a>     |
| <i>Xanthomonas</i> phage Xop411        | <i>X. oryzae</i>                                 | <i>Siphoviridae</i> | 44520  | <a href="#">DQ777876.1</a>  | <a href="#">ABK00157.1</a>     | <a href="#">ABK00154.1</a>     |
| <i>Xanthomonas</i> phage Xp10          | <i>X. oryzae</i>                                 | <i>Siphoviridae</i> | 44373  | <a href="#">AY299121.1</a>  | <a href="#">AAP58676.1</a>     | <a href="#">AAP58673.1</a>     |
| <i>Xanthomonas</i> phage Xp15          | <i>X. campestris</i> pv. <i>pelargonii</i>       | <i>Siphoviridae</i> | 55770  | <a href="#">AY986977.1</a>  | <a href="#">AAX84853.1</a>     | <a href="#">AAX84927.1</a>     |
| <i>Xanthomonas</i> phage XPP1          | <i>X. oryzae</i> pv. <i>oryzae</i>               | <i>Myoviridae</i>   | 46195  | <a href="#">MG944227.1</a>  | <a href="#">AVO23667.1</a>     | <a href="#">AVO23662.1</a>     |
| <i>Xanthomonas</i> phage XPP2          | <i>X. oryzae</i> pv. <i>oryzae</i>               | <i>Myoviridae</i>   | 46480  | <a href="#">MG944228.1</a>  | <a href="#">AVO23722.1</a>     | <a href="#">AVO23717.1</a>     |
| <i>Xanthomonas</i> phage XPP3          | <i>X. oryzae</i> pv. <i>oryzae</i>               | <i>Myoviridae</i>   | 49612  | <a href="#">MG944229.1</a>  | <a href="#">AVO23799.1</a>     | <a href="#">AVO23794.1</a>     |
| <i>Xanthomonas</i> phage XPP4          | <i>X. oryzae</i> pv. <i>oryzae</i>               | <i>Myoviridae</i>   | 47397  | <a href="#">MG944230.1</a>  | <a href="#">AVO23889.1</a>     | <a href="#">AVO23884.1</a>     |
| <i>Xanthomonas</i> phage XPP6          | <i>X. oryzae</i> pv. <i>oryzae</i>               | <i>Myoviridae</i>   | 46281  | <a href="#">MG944231.1</a>  | <a href="#">AVO23998.1</a>     | <a href="#">AVO23993.1</a>     |
| <i>Xanthomonas</i> phage XPP8          | <i>X. oryzae</i> pv. <i>oryzae</i>               | <i>Myoviridae</i>   | 46278  | <a href="#">MG944232.1</a>  | <a href="#">AVO24023.1</a>     | <a href="#">AVO24028.1</a>     |
| <i>Xanthomonas</i> phage XPP9          | <i>X. oryzae</i> pv. <i>oryzae</i>               | <i>Myoviridae</i>   | 48669  | <a href="#">MG944233.1</a>  | <a href="#">AVO24107.1</a>     | <a href="#">AVO24102.1</a>     |
| <i>Xanthomonas</i> phage XPV1          | <i>X. oryzae</i> pv. <i>oryzae</i>               | <i>Myoviridae</i>   | 46503  | <a href="#">MG944234.1</a>  | <a href="#">AVO24222.1</a>     | <a href="#">AVO24217.1</a>     |
| <i>Xanthomonas</i> phage XPV2          | <i>X. oryzae</i> pv. <i>oryzae</i>               | <i>Myoviridae</i>   | 45969  | <a href="#">MG944235.1</a>  | <a href="#">AVO24254.1</a>     | <a href="#">AVO24259.1</a>     |
| <i>Xanthomonas</i> phage XPV3          | <i>X. oryzae</i> pv. <i>oryzae</i>               | <i>Myoviridae</i>   | 47046  | <a href="#">MG944236.1</a>  | <a href="#">AVO24390.1</a>     | <a href="#">AVO24319.1</a>     |
| <i>Xylella</i> phage Paz               | <i>X. fastidiosa</i>                             | <i>Podoviridae</i>  | 43869  | <a href="#">KF626666.1</a>  | <a href="#">AHB12129.1</a>     | <a href="#">AHB12142.1</a>     |
| <i>Xylella</i> phage Prado             | <i>X. fastidiosa</i>                             | <i>Podoviridae</i>  | 43940  | <a href="#">KF626667.1</a>  | <a href="#">AHB12182.1</a>     | <a href="#">AHB12195.1</a>     |
| <i>Xylella</i> Phage Salvo             | <i>X. fastidiosa</i>                             | <i>Siphoviridae</i> | 55601  | <a href="#">KF626668.1</a>  | <a href="#">AHB12256.1</a>     | <a href="#">AHB12262.1</a>     |
| <i>Xylella</i> Phage Sano              | <i>X. fastidiosa</i>                             | <i>Siphoviridae</i> | 56147  | <a href="#">KF626665.1</a>  | <a href="#">AHB12081.1</a>     | <a href="#">AHB12087.1</a>     |
| <i>Xylella</i> phage Xfas53            | <i>X. fastidiosa</i>                             | <i>Podoviridae</i>  | 36674  | <a href="#">GQ421471.1</a>  | <a href="#">ACV41134.1</a>     | <a href="#">ACV41131.1</a>     |

For phylogenetic analysis, protein sequences of the Major Capsid Protein (MCP) and Terminase Large subunit (Terminase\_Lsu) of the *Caudovirales* bacteriophages infecting *Xanthomonadales* were downloaded from the Genbank database (Table S2). Sequence alignments were performed using ClustalW, and cladograms were built using the MEGA-X software [1]. Aminoacid sequence data set were concatenated using Mesquite Version 2.6 [2]. Then, trees were inferred based on the maximum-likelihood Statistical method using MEGA-X and bootstrap values were calculated from 1,000 bootstrap replications. Genetic distances were determined by the Jones-Taylor-Thornton (JTT) model [3].

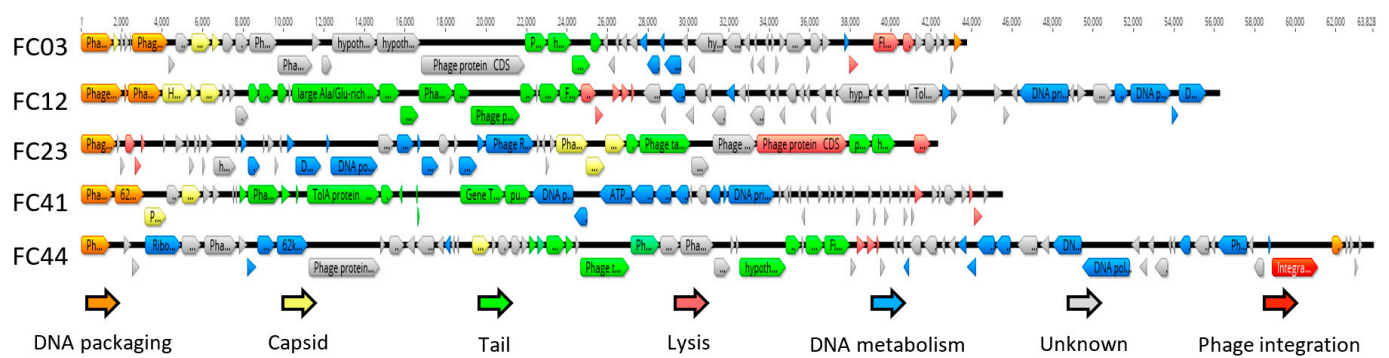

**Figure S1.** Genomic organization and main functions encoded by FC03-Usme, FC12-Bacata, FC23-Cota, FC41-Suba and FC44-Bosa phage genomes, the type phages of the 5 PCR groups defined in this study. .



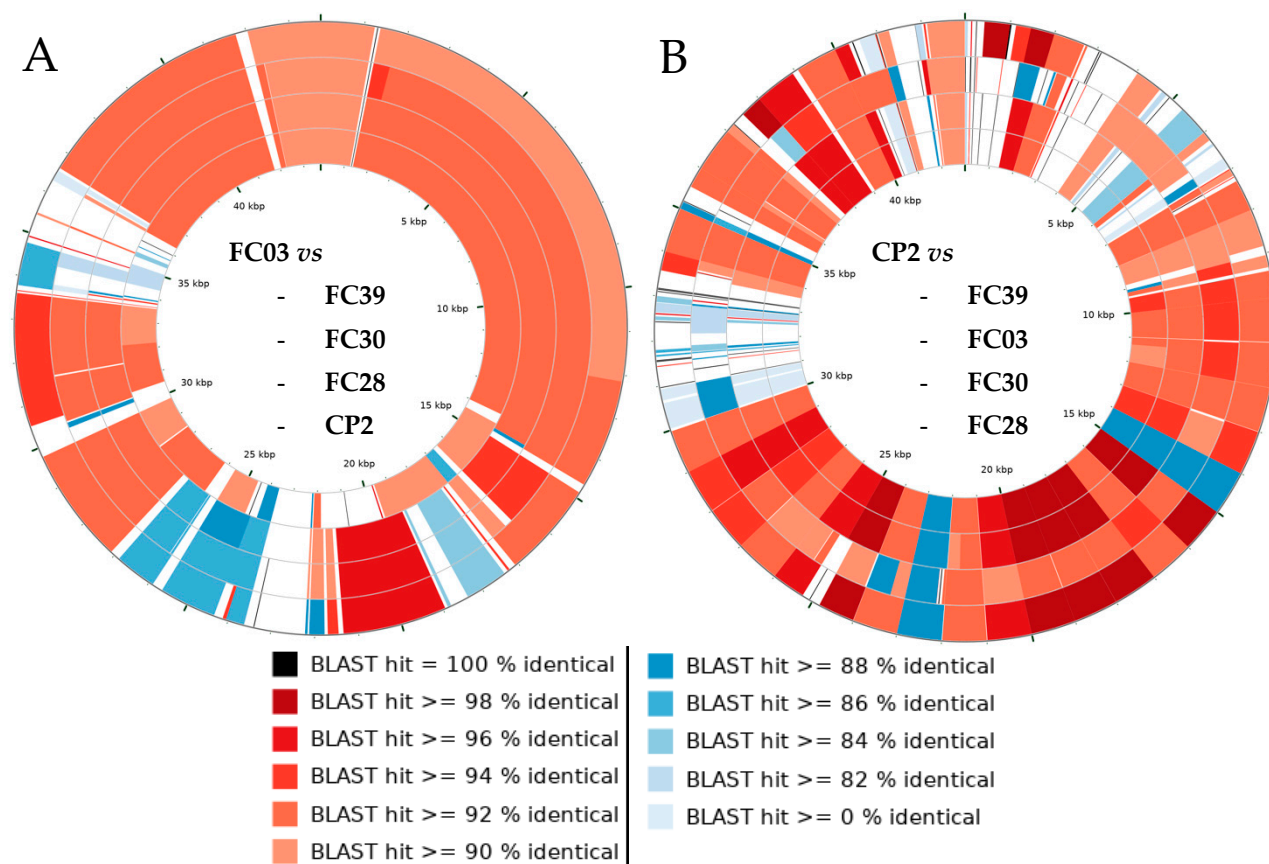

**Figure S2.** Visualization of BLAST-pairwise comparisons of genome sequences of FC03-Usme-like phages and *Xanthomonas axonopodis* phage CP2. Genomic sequences of isolated phage FC03-Usme, and *X. axonopodis* phage CP2 were cut in 1 kb-length fragments. Conservation of each fragment of a query genome was searched in the others using the BLASTN algorithm. The CGVIEW analytic tool [4] was used to represent the results, with the order of phage genome given from the external to the internal circles. The color scale indicates the level of identity. White stripes indicate fragments from the query genome that are absent in the others. A- Pairwise comparisons of FC03-Usme versus FC39-Tenjo, FC30-Tabio, FC28-Sopo and *X. axonopodis* phage CP2; B- Pairwise comparisons of *X. axonopodis* phage CP2 versus FC39-Tenjo, FC03-Usme, FC30-Tabio and FC28-Sopo.

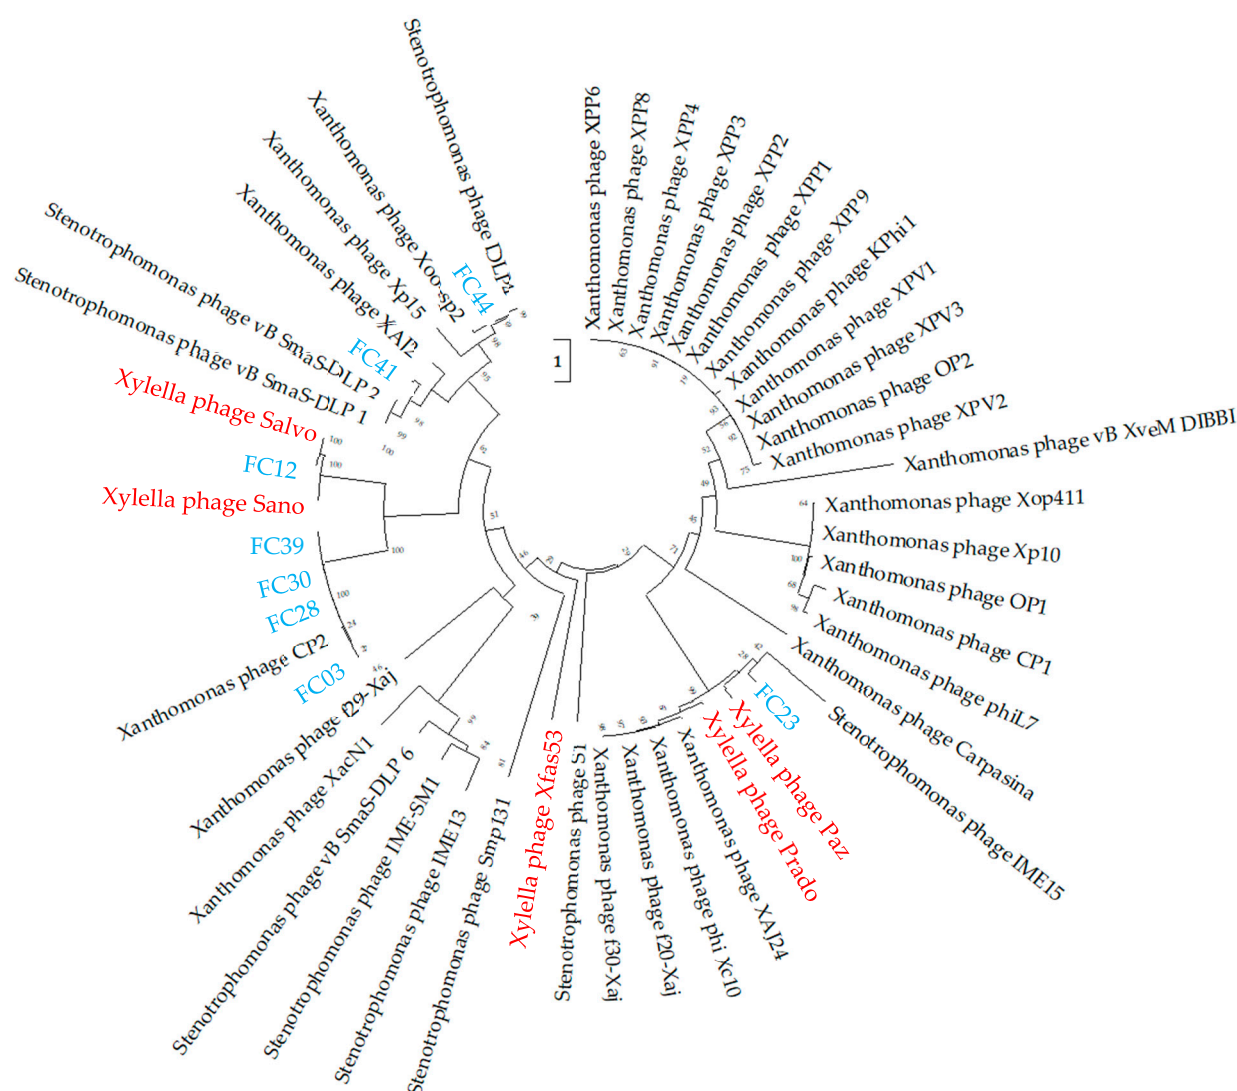

**Figure S3. Phylogeny of phages infecting Xanthomonads.** Circular cladograms showing the relationships between amino acid sequences obtained in this study and the isolated Caudovirales phages active on various species of the genera *Xanthomonas* and *Stenotrophomonas*. The Neighbor Joining trees based on the concatenated alignment of the conserved Major Capsid Protein and the Terminase large subunit protein with the highest log likelihood - (-100895.80) are shown. Initial tree for the heuristic search was obtained automatically by applying Neighbor-Join to a matrix of pairwise distances estimated using the JTT model, and then selecting the topology with superior log likelihood value. This analysis involved 51 amino acid sequences. A total of 2214 positions were analyzed in the final dataset. Numbers indicated on branches indicate the number of substitutions per site. Red labels highlight referenced bacteriophages that are active on *X. fastidiosa* and blue labels highlight bacteriophages isolated in this study.

### Supplemental References:

1. Kumar, S.; Stecher, G.; Li, M.; Knyaz, C.; Tamura, K. MEGA X: Molecular Evolutionary Genetics Analysis across Computing Platforms. *Mol Biol Evol* **2018**, *35*, 1547–1549, doi:10.1093/molbev/msy096.
2. Maddison, W.; Maddison, D. Mesquite: A Modular System for Evolutionary Analysis. Version 2.6 Available online: /paper/Mesquite%3A-a-modular-system-for-evolutionary-Version-Maddison-Maddison/7a6142cfa79cc01ceced5e144bd0e01a0f241a74 (accessed on 20 September 2020).
3. Jones, D.T.; Taylor, W.R.; Thornton, J.M. The Rapid Generation of Mutation Data Matrices from Protein Sequences. *Bioinformatics* **1992**, *8*, 275–282, doi:10.1093/bioinformatics/8.3.275.
4. Stothard, P.; Wishart, D.S. Circular Genome Visualization and Exploration Using CGView. *Bioinformatics* **2005**, *21*, 537–539, doi:10.1093/bioinformatics/bti054.
